# Supplementary material for: TLR5 participates in the TLR4 receptor complex and promotes MyD88-dependent signaling in environmental lung injury
Source: eLife. 2020 Jan 28;9:e50458. doi: 10.7554/eLife.50458 (PMC7032926; doi:10.7554/eLife.50458)
Supplement: Supplementary file 1. [file elife-50458-supp1.xls]

## Sheet: Suppl. FIle 1a
Gene	logFC WT_LPS-WT_PBS	logFC KO_LPS-KO_PBS	abslogFC (KO_LPS-KO_PBS)-(WT_LPS-WT_PBS)2	P.Value WT_LPS-WT_PBS	P.Value KO_LPS-KO_PBS	NFkB pathway association?
H2-Ea-ps	1.16048	0.27974	0.88074	0.0164028	0.558226	?
Fcer2a	0.96001	0.0845662	0.875444	0.000102562	0.719053	canonical
Cxcl2	6.99097	7.84294	0.851963	1.18274e-21	2.61937e-20	canonical
Retnlb	1.1967	1.96007	0.763372	0.0112754	0.000709407	canonical
Il6	6.45774	7.20069	0.742953	8.80803e-13	4.79521e-12	canonical
Sele	3.27009	3.97562	0.70553	2.45962e-12	4.70546e-13	canonical
Ccl12	3.20424	3.90701	0.702764	1.6951e-16	8.54386e-17	canonical
Il23a	4.13972	3.46821	0.671508	7.05449e-15	4.26551e-13	canonical
Camp	3.73024	3.07976	0.650485	1.3699e-07	1.05857e-05	canonical
Elovl6	1.98673	1.35312	0.633607	1.18861e-11	8.34328e-08	?
Il10	1.22322	0.59174	0.631477	5.64278e-05	0.0565762	canonical
Mmp12	1.38014	0.756604	0.62354	1.15638e-09	9.40473e-05	possible
Mx1	5.09619	4.47629	0.619895	3.8902e-17	2.18783e-15	canonical
Tnfrsf8	1.0927	1.70536	0.612663	6.41045e-05	8.91293e-07	canonical
Cxcr2	4.50143	3.89528	0.606155	1.7776e-16	6.71727e-15	canonical
Adamts14	1.10786	0.533233	0.574629	6.58884e-06	0.0213397	?
Il27	1.02612	1.58694	0.560816	0.0003142	1.3411e-05	canonical
Ccl4	5.67494	6.22215	0.547212	2.00761e-15	2.45821e-14	canonical
Fcnb	1.62642	1.09641	0.530011	3.17567e-06	0.00121296	?
Elane	1.64914	1.12738	0.52176	5.93162e-06	0.00158402	canonical
Cxcl11	5.39103	4.89627	0.494764	1.58815e-12	6.02502e-11	canonical
Cxcl1	7.64253	8.13683	0.494303	7.02469e-20	7.61058e-19	canonical
Fosl1	2.42143	2.90235	0.480919	1.7605e-08	3.10021e-08	?
Ptgs2	2.05626	2.52363	0.467371	6.6522e-16	1.18243e-16	canonical
Cdkn1a	3.42455	2.96139	0.463166	6.65169e-17	1.68035e-14	canonical
Cebpd	3.66727	4.12006	0.452791	5.40029e-12	2.11422e-11	possible
Lif	1.19381	1.63952	0.445713	7.00746e-08	1.09125e-09	canonical
Csf3	4.09077	4.53063	0.439866	1.04912e-11	2.79296e-11	canonical
Nod2	2.79688	2.36069	0.436185	7.04619e-17	3.05812e-14	canonical
Areg	1.36943	1.79574	0.426312	1.02402e-08	7.23573e-10	possible
Ido1	4.18051	3.76077	0.41974	1.28886e-11	5.07453e-09	noncanonical
Tlr6	1.51813	1.11789	0.400242	1.26232e-11	5.81883e-08	both
S100a8	5.15598	4.76199	0.393984	8.05002e-20	7.92562e-18	predicted
Cyp1b1	1.30553	0.937488	0.368042	2.2939e-09	3.5602e-06	?
Tnf	4.7441	4.37741	0.366689	5.99746e-19	2.50188e-17	canonical
Crem	1.01952	0.65352	0.366001	5.34499e-09	4.98558e-05	canonical
Ripk2	2.3437	1.97946	0.364244	1.59357e-16	6.73546e-14	canonical
Tnfaip6	2.94715	3.311	0.363855	6.52015e-14	2.0849e-13	possible
Il15	2.59978	2.24172	0.358059	1.53724e-15	3.05403e-13	canonical
Ccl24	1.04399	1.40186	0.357869	5.44182e-05	4.42888e-06	?
Tlr13	2.49449	2.13686	0.357631	8.61554e-16	3.98976e-13	?
Cd40	3.27646	2.92308	0.353375	1.06517e-19	1.94205e-17	canonical
Mmp8	5.1355	4.7934	0.342101	1.10148e-16	4.65531e-15	canonical
Mmp13	2.8641	3.19897	0.334871	1.23127e-13	6.24807e-13	possible
Rgs16	4.18717	4.52186	0.334699	7.27247e-19	6.07049e-18	canonical
Prg2	1.09093	1.41963	0.328707	0.00110844	0.000387197	?
Nod1	1.56244	1.23636	0.326076	4.43722e-14	8.55466e-11	canonical
Bid	1.74257	1.41742	0.325151	9.49394e-13	6.67788e-10	?
S100a9	5.17861	4.85362	0.324988	2.06263e-19	1.32332e-17	predicted
Batf	2.65472	2.33518	0.319541	5.67765e-21	2.39528e-18	possible
Sell	2.22685	1.90988	0.316972	5.11486e-17	2.85098e-14	possible
Lag3	1.50377	1.18965	0.314126	4.36235e-09	2.13697e-06	?
Irf5	1.99773	1.6875	0.31023	3.40331e-17	2.44235e-14	predicted
Cd70	1.00129	0.693661	0.30763	0.000261978	0.0155557	canonical
Ccl3	6.70056	6.39336	0.307202	4.19672e-20	3.1605e-19	canonical
Casp1	1.46825	1.16923	0.299017	1.78313e-11	1.2596e-08	?
Il15ra	1.92955	1.64023	0.289322	4.98764e-14	2.50864e-11	possible
Klk1	1.27894	0.990402	0.288534	2.94513e-09	2.00869e-06	?
Slc16a6	1.01695	1.30392	0.286969	6.36832e-07	8.54231e-08	?
Mmp9	1.35693	1.07033	0.286592	2.25367e-08	9.63942e-06	canonical
Ikbke	2.38856	2.10299	0.285573	1.47557e-17	3.07384e-15	canonical
Tnfrsf9	3.69969	3.42026	0.279436	2.45513e-15	1.16582e-13	canonical
P2rx1	1.11943	1.39558	0.276148	1.30225e-06	9.0406e-07	?
Edn1	1.24334	0.969006	0.274337	1.36678e-09	1.32366e-06	canonical
Fcgr3	1.29415	1.5682	0.274051	1.05882e-11	5.14431e-12	?
Cxcl3	8.29408	8.02008	0.273999	1.20495e-23	1.16326e-22	canonical
Irf1	2.37396	2.10132	0.272641	2.08576e-20	9.65438e-18	canonical
Il4i1	5.24467	5.51673	0.272063	4.83301e-21	3.62276e-20	both
Ccr7	1.27636	1.00483	0.271528	7.40197e-12	1.0236e-08	canonical
Socs3	3.63866	3.90652	0.267859	3.15417e-20	1.48032e-19	?
Flnb	1.51563	1.25201	0.263622	1.54224e-13	1.22263e-10	?
Adora2a	1.67618	1.41299	0.263181	1.49061e-12	5.90603e-10	canonical
Ifit1bl2	2.58296	2.32001	0.262951	1.04593e-12	2.06386e-10	?
Mob3c	2.08445	1.82217	0.262278	6.42238e-16	2.87867e-13	predicted
Adamts4	5.27431	5.53436	0.260048	2.36142e-21	4.87996e-20	canonical
Marco	2.17239	1.91271	0.259689	2.19176e-12	7.31123e-10	?
Clic4	2.31472	2.05626	0.258464	1.1486e-20	4.72512e-18	canonical
Ifit1bl1	4.49917	4.24284	0.256331	2.89243e-17	1.02048e-15	?
Il17ra	1.24516	0.993347	0.251816	1.14587e-13	1.73485e-10	?
Cxcl9	6.34561	6.0942	0.251415	5.1565e-20	4.44922e-18	canonical
Csf2	4.20917	4.38408	0.274905	7.24566e-16	2.78829e-15	canonical
Adora3	1.71235	1.96231	0.24996	6.15387e-10	9.60882e-10	?
Ccl11	2.92111	2.67407	0.247039	1.36448e-14	1.20244e-12	canonical
Cd209e	1.03973	0.793296	0.246429	0.000470125	0.0145997	?
Ptprc	1.05515	0.813721	0.241433	6.56874e-12	1.51464e-08	?
Il33	1.52986	1.29282	0.237039	3.70672e-16	2.48555e-13	?
Itgam	1.52376	1.28771	0.236047	4.83972e-12	1.91467e-09	?
Tlr9	1.52023	1.28465	0.235589	4.18949e-10	1.45127e-07	canonical
Ptafr	2.88958	2.65425	0.235331	1.37849e-18	1.79111e-16	canonical
Ptx3	6.50102	6.73353	0.232501	3.10358e-14	1.69138e-13	canonical
Ccl5	3.08872	2.8592	0.229521	5.38823e-19	4.50698e-17	canonical
Cxcl13	2.62813	2.40768	0.220455	8.01335e-11	7.01936e-09	predicted
Gadd45b	2.10003	1.88197	0.218058	1.40594e-20	3.90692e-18	canonical
Cd69	3.16224	2.94501	0.217224	2.34237e-11	6.56766e-10	canonical
Nfkbiz	2.89119	2.67486	0.216336	3.71401e-20	2.82745e-18	canonical
Sphk1	2.7057	2.49031	0.215398	2.96186e-16	3.06693e-14	canonical
Nfil3	3.12588	2.91182	0.214062	3.30681e-16	1.8183e-14	possible
Csf3r	2.63278	2.42253	0.210256	7.33884e-15	4.61252e-13	possible
Ccl2	6.69694	6.90674	0.209802	9.20701e-21	4.95352e-20	canonical
Cd80	2.68313	2.47473	0.208392	7.76779e-15	4.06331e-13	canonical
Myd88	2.7253	2.51754	0.207761	1.33504e-21	1.50906e-19	canonical
Tgm2	2.08355	1.87622	0.207328	6.07593e-19	1.65771e-16	canonical
Adam8	1.29324	1.0867	0.206543	3.48583e-09	5.86683e-07	?
Csf1	2.79164	2.58701	0.204632	1.6921e-21	1.8985e-19	canonical
Maff	2.89758	2.69444	0.203139	2.34922e-22	1.76267e-20	?
Ly6g	3.35884	3.56178	0.20294	3.74499e-12	7.50265e-11	?
Birc3	3.2801	3.07946	0.200642	2.08746e-24	1.86923e-22	?
Klrk1	1.18137	0.982275	0.199091	4.25603e-07	4.09109e-05	predicted
Trex1	3.56199	3.36409	0.197906	3.2629e-21	2.45462e-19	predicted
Trafd1	2.6723	2.47569	0.19661	7.98571e-20	9.35049e-18	?
Gata1	1.04945	0.860479	0.188967	2.65692e-06	0.000252911	?
Tap2	1.62212	1.43337	0.188749	1.72492e-11	3.3719e-09	predicted
Birc2	2.19254	2.00435	0.188192	1.34947e-19	2.17744e-17	canonical
H2-M3	1.06604	0.877932	0.18811	3.94347e-08	1.09003e-05	?
Adamts9	2.53638	2.34961	0.186768	3.44569e-15	4.22734e-13	?
Hif1a	2.10407	1.92072	0.183352	6.52118e-20	1.25472e-17	canonical
Casp7	0.979991	0.798281	0.181711	4.40479e-09	1.60834e-06	predicted
Rin2	1.00794	0.827869	0.180075	6.80543e-14	8.7106e-11	predicted
Tnfaip3	4.61073	4.43494	0.17579	3.31167e-24	1.31001e-22	canonical
Malt1	2.6896	2.51437	0.175232	1.38512e-20	1.07016e-18	predicted
Il4ra	2.17633	2.0058	0.170529	3.38791e-18	4.64455e-16	?
Nfkbie	3.52028	3.35111	0.169179	3.82464e-21	2.63494e-19	canonical
Pdcd1	1.99161	1.8236	0.16801	5.69187e-07	1.82388e-05	canonical
Batf3	1.27923	1.44699	0.167754	1.99007e-09	4.32034e-09	predicted
Cyr61	1.20939	1.04309	0.166303	8.22618e-09	1.12048e-06	?
Ccrl2	3.09157	2.92568	0.165888	4.49291e-17	2.91049e-15	predicted
Ccl7	5.42648	5.59235	0.165873	2.06669e-18	7.93677e-18	predicted
Mx2	5.45273	5.61786	0.165136	4.29583e-18	1.20258e-16	?
Fcgr1	3.14513	2.98058	0.164549	3.83722e-16	2.36813e-14	?
Amica1	2.4759	2.31269	0.163207	6.81984e-16	6.6209e-14	?
Nampt	2.36341	2.20024	0.163163	3.9712e-21	4.86397e-19	possible
Stat1	1.98114	1.81902	0.162122	6.49771e-12	6.00993e-10	predicted
Fscn1	1.16	0.998163	0.161834	5.68788e-12	1.79722e-09	?
Cd274	4.46049	4.29917	0.161325	2.04137e-21	8.24181e-20	canonical
Fpr1	2.04962	2.20828	0.158666	4.9327e-13	2.93136e-12	?
Cd47	1.1309	0.972295	0.158605	7.20576e-15	4.10142e-12	?
Plaur	2.05152	2.20557	0.154045	6.33855e-13	2.11187e-12	?
Ccl17	4.4825	4.63537	0.152872	3.25761e-22	5.21101e-21	canonical
Serpine1	4.65128	4.49921	0.152063	2.33493e-24	1.05609e-22	?
Stat3	1.42794	1.27747	0.150472	9.40121e-19	2.79047e-16	possible
Selp	4.56886	4.71873	0.14987	7.30898e-18	5.10012e-17	canonical
Vcam1	2.80258	2.951	0.148418	6.30391e-20	6.83237e-19	canonical
Tnfrsf1b	1.98717	1.83929	0.147884	3.00753e-16	2.53386e-14	canonical
Psmb9	1.26223	1.12064	0.141594	9.5088e-12	2.047e-09	canonical
Tnc	0.969755	1.1112	0.141446	2.27135e-07	2.40756e-07	canonical
Nfkbia	3.29932	3.16299	0.136332	2.28199e-23	1.29567e-21	canonical
Tlr3	2.05306	1.91741	0.135642	5.52684e-15	6.10618e-13	?
Tnfsf10	1.19791	1.06406	0.133845	1.60385e-11	2.59064e-09	canonical
Il12b	2.33461	2.46557	0.130959	2.96947e-10	2.56773e-09	canonical
Tlr7	1.3206	1.19219	0.128405	1.12803e-10	8.90097e-09	?
Fcgr2b	1.85052	1.72241	0.12811	2.36113e-17	2.26034e-15	possible
Cd14	5.42595	5.30246	0.123484	1.67723e-28	4.94731e-27	possible
Hdc	2.63848	2.51549	0.122995	1.7215e-15	6.84792e-14	?
Cebpb	1.67712	1.55481	0.122312	4.95582e-19	6.39626e-17	predicted
Gem	2.56024	2.68152	0.121275	2.73102e-21	2.4332e-20	?
Fut4	1.26453	1.14399	0.120544	2.42739e-10	2.43452e-08	?
Il1a	4.71296	4.59365	0.119304	4.10886e-21	6.00519e-20	canonical
Pglyrp1	1.85197	1.96998	0.118015	1.84774e-13	9.61979e-13	canonical
Fcgr4	2.14183	2.02571	0.116123	3.03712e-11	1.12065e-09	possible
Tmem173	1.88824	2.00359	0.115348	7.75769e-17	4.63792e-16	predicted
Emp1	1.29318	1.18299	0.110185	1.01466e-14	1.33291e-12	?
Bcl10	1.34648	1.23698	0.1095	5.95771e-17	7.75956e-15	possible
Il10ra	1.64183	1.53262	0.109209	1.57301e-11	8.64377e-10	?
Ccl9	3.06749	2.9606	0.106882	2.07963e-19	8.78883e-18	?
Hbegf	1.6997	1.80433	0.104632	5.36527e-14	2.07829e-13	?
Map2k1	1.14945	1.04665	0.102808	1.27029e-14	1.77681e-12	?
Saa1	5.14749	5.04552	0.101975	3.2854e-12	1.85458e-10	canonical
Ccl22	4.41678	4.51872	0.101942	2.28504e-22	3.97068e-21	predicted
Tapbp	1.41576	1.31511	0.100643	1.12208e-15	1.31195e-13	canonical
Ccr5	0.989602	1.09021	0.100606	1.86689e-07	3.7743e-07	canonical
Stat5a	1.37898	1.27983	0.0991474	1.97476e-17	1.71772e-15	canonical
Irf2	1.30528	1.21143	0.0938516	1.20442e-14	1.16618e-12	canonical
H2-K1	1.19681	1.10453	0.0922823	1.20397e-06	3.35819e-05	?
Cd86	2.32061	2.41122	0.0906168	4.30385e-17	5.08326e-16	canonical
Tnfrsf12a	2.23566	2.32594	0.0902825	2.26968e-15	1.81043e-14	canonical
S1pr1	1.60633	1.51626	0.0900715	1.07604e-14	7.61272e-13	?
Ell2	0.955072	0.865291	0.089781	4.11646e-09	2.05968e-07	predicted
Ccr1	3.0481	3.13615	0.088045	5.79821e-14	4.8896e-13	?
Psmb8	1.79671	1.70905	0.0876604	2.6796e-15	1.89553e-13	?
Prok2	1.79911	1.88382	0.084705	9.2265e-08	5.9278e-07	?
Il25	0.956588	1.04109	0.0844994	0.00368868	0.00388497	predicted
Rhoj	1.36366	1.28084	0.0828206	2.34227e-15	2.02436e-13	?
Cxcl5	6.51015	6.59133	0.0811732	1.16477e-18	8.00678e-18	canonical
Itga5	1.00049	0.920612	0.0798773	4.85685e-09	2.20084e-07	predicted
Tap1	3.0675	2.98889	0.0786079	1.91403e-20	1.23722e-18	canonical
Rgs1	2.69577	2.77315	0.07738	2.5538e-10	1.2497e-09	?
Irf7	4.45244	4.52763	0.0751883	1.14645e-21	2.44585e-20	canonical
Cd44	1.46317	1.53545	0.0722798	4.29018e-11	1.80407e-10	canonical
H2-Q1	1.39633	1.32454	0.0717887	2.8919e-11	1.79573e-09	?
Enc1	1.35149	1.2806	0.0708877	2.30939e-12	1.21391e-10	predicted
Osm	3.6198	3.54894	0.0708596	5.67393e-13	3.29504e-12	?
Cx3cl1	1.0975	1.02746	0.0700341	3.2532e-10	1.72521e-08	?
Nfkb1	1.39694	1.32732	0.0696119	3.71353e-16	2.48791e-14	canonical
C5ar1	1.87594	1.80698	0.0689611	1.71676e-12	6.73085e-11	?
Ier3	1.16331	1.23175	0.0684384	2.03176e-13	9.60892e-13	canonical
H2-D1	1.05183	0.983687	0.0681404	1.36045e-07	4.21119e-06	?
Anxa1	2.38198	2.31419	0.0677916	6.97875e-20	2.85859e-18	?
S100a11	0.971743	0.905481	0.0662618	2.68203e-14	2.23304e-12	?
Cybb	1.96545	1.90077	0.0646757	7.67738e-18	3.58111e-16	possible
Tlr2	3.35357	3.41741	0.063837	3.29252e-21	5.78879e-20	?
Nlrp3	3.72104	3.65916	0.0618747	5.90096e-18	6.73348e-17	canonical
Gch1	2.45396	2.39295	0.0610046	1.2446e-17	4.14142e-16	?
Aoah	2.31232	2.25141	0.060908	1.12726e-13	3.70402e-12	?
Peli1	1.01744	0.957155	0.0602863	1.03968e-13	6.69194e-12	?
Cxcl10	10.2522	10.3118	0.0595936	3.4506e-24	9.30718e-23	canonical
Syk	1.21766	1.15941	0.058252	2.34724e-13	9.74486e-12	?
Clec5a	2.63926	2.58621	0.053049	5.85524e-15	2.61249e-13	?
Ceacam1	1.49035	1.4397	0.0506438	1.85545e-11	5.2831e-10	?
Timd4	1.67444	1.72492	0.0504731	3.33239e-12	3.87426e-11	?
Ccl20	8.2812	8.23077	0.0504299	2.85042e-20	3.73472e-19	canonical
Usp18	4.49448	4.44744	0.0470417	7.93965e-21	2.10176e-19	canonical
Il1b	6.1409	6.18715	0.046255	1.05647e-23	8.37303e-23	canonical
Tnfsf9	1.35508	1.40049	0.0454153	3.3335e-10	3.54498e-09	canonical
Icosl	1.26034	1.30457	0.0442242	9.8315e-12	7.53094e-11	?
Ly6c1	1.50002	1.45635	0.0436689	6.62609e-14	2.49237e-12	?
Isg15	5.60197	5.6449	0.0429342	2.03906e-25	4.90103e-24	?
Cxcl16	1.92045	1.88032	0.0401234	2.23956e-17	8.61146e-16	predicted
Rnd3	1.4903	1.53024	0.0399393	4.69154e-14	5.406e-13	?
H2-Q10	1.79011	1.75133	0.0387887	2.77336e-08	3.4396e-07	?
Trem1	3.03236	3.07098	0.038617	2.97208e-14	2.71821e-13	canonical
Smad1	1.23311	1.19513	0.0379793	8.22014e-15	2.88023e-13	?
Il1r1	1.05146	1.08942	0.0379615	1.7413e-12	1.39684e-11	?
Icam1	2.72071	2.68382	0.0368856	8.63679e-23	2.81013e-21	canonical
Cd83	3.24774	3.21513	0.0326057	6.04503e-21	1.11865e-19	canonical
Tnfrsf11a	1.93794	1.91104	0.0268966	1.26796e-15	3.75897e-14	?
Fpr2	3.41561	3.44172	0.0261076	2.73333e-17	6.41196e-16	?
Daxx	3.14201	3.11671	0.0252987	9.93378e-18	3.68492e-16	?
Socs1	3.08455	3.06039	0.0241555	3.23015e-15	9.36686e-14	?
Atf3	3.51989	3.49714	0.0227445	4.18213e-15	8.32429e-14	predicted
Gpr65	1.61514	1.59337	0.0217667	2.47517e-10	5.52265e-09	?
S100a10	1.22987	1.21342	0.0164422	6.42864e-18	1.95193e-16	canonical
Psme2	1.67438	1.65804	0.016342	1.1113e-17	3.0884e-16	canonical
Dusp1	1.73856	1.72242	0.0161478	7.77896e-11	1.44062e-09	canonical
Marcksl1	4.46928	4.48249	0.013215	1.76946e-22	4.03722e-21	?
Acod1	6.10226	6.11486	0.0125989	4.80242e-10	3.70233e-09	?
Rab20	2.88647	2.87742	0.00904654	6.20163e-19	1.38012e-17	?
Ccl19	4.55843	4.54986	0.00856985	7.17388e-23	2.73673e-21	canonical
Fas	2.7216	2.72877	0.00716782	3.0377e-18	6.57965e-17	canonical
Dusp2	3.27153	3.26541	0.00612226	4.19523e-15	5.35407e-14	predicted
Sema4a	1.13899	1.14498	0.00599137	2.03974e-13	3.29961e-12	predicted
Rhoc	2.23998	2.23723	0.00274524	2.44893e-18	7.70805e-17	predicted
Ctla4	1.25578	1.25657	0.000790184	1.82381e-05	8.85403e-05	?
logFCWT-KO	% NFkB responsive genes	All genes	not predicted NFkB responsive	predicted NFkB responsive		Notes
0.7-0.9	88.8889	9	1	8		62%-86% difference between KO and WT
0.5-0.6	76.4706	17	4	13		41%-52% difference between KO and WT
0.4	81.25	16	3	13		32% difference between KO and WT
0.3	64.1026	39	14	25		25% difference between KO and WT
0.2	61.0169	59	23	36		15% difference between KO and WT
0.1	54.2857	70	32	38		7% difference between KO and WT
0	50	32	16	16		no difference

## Sheet: Suppl. File 1b
Gene	GeneClass	adj.P.Val KO_PBS-WT_PBS
Il4	Endogenous	0.83266
Cx3cr1	Endogenous	0.995811
Ear3	Endogenous	0.995811
Ccl28	Endogenous	0.995811
Nfatc2	Endogenous	0.995811
Ccr7	Endogenous	0.995811
Ccl22	Endogenous	0.995811
Tnfaip3	Endogenous	0.995811
Ptprb	Endogenous	0.995811
Ccl21a	Endogenous	0.995811
Trim9	Endogenous	0.995811
Olr1	Endogenous	0.995811
Ets1	Endogenous	0.995811
Serpine1	Endogenous	0.995811
Stat5a	Endogenous	0.995811
Flrt2	Endogenous	0.995811
Hip1r	Endogenous	0.995811
Ndufa7	Endogenous	0.995811
Ctla4	Endogenous	0.995811
Mob3c	Endogenous	0.995811
Fgf2	Endogenous	0.996296
Mok	Endogenous	0.843303
Ccl26	Endogenous	0.995811
Cd68	Endogenous	0.995811
Hras	Endogenous	0.995811
Vav2	Endogenous	0.995811
C3ar1	Endogenous	0.995811
Btk	Endogenous	0.995811
Ccl4	Endogenous	0.995811
Crem	Endogenous	0.995811
Fcer1a	Endogenous	0.995811
Cd40	Endogenous	0.995811
Twistnb	Endogenous	0.995811
H2-Eb1	Endogenous	0.995811
Cd86	Endogenous	0.995811
Tlr9	Endogenous	0.995811
Il1rl1	Endogenous	0.995811
Psme2	Endogenous	0.995811
Fcnb	Endogenous	0.995811
Nfil3	Endogenous	0.996296
Clec5a	Endogenous	0.995811
Cma1	Endogenous	0.83266
Ski	Endogenous	0.995811
Nox1	Endogenous	0.83266
Hc	Endogenous	0.995811
Igf2	Endogenous	0.995811
Pdzk1ip1	Endogenous	0.995811
Nr4a2	Endogenous	0.995811
Crip1	Endogenous	0.995811
Hdc	Endogenous	0.995811
Bmp8a	Endogenous	0.995811
Ccl24	Endogenous	0.995811
Ccl20	Endogenous	0.995811
Cd274	Endogenous	0.995811
Des	Endogenous	0.995811
Ikzf1	Endogenous	0.995811
Cd80	Endogenous	0.995811
Ccr3	Endogenous	0.995811
Ccl3	Endogenous	0.995811
Lpl	Endogenous	0.83266
Irf4	Endogenous	0.995811
Klf10	Endogenous	0.995811
Hif1a	Endogenous	0.995811
Epx	Endogenous	0.995811
Il12b	Endogenous	0.83266
Fem1c	Endogenous	0.995811
Fcgr1	Endogenous	0.995811
Klk1	Endogenous	0.995811
Il4ra	Endogenous	0.995811
H2-Q10	Endogenous	0.995811
Raf1	Endogenous	0.995811
Flt1	Endogenous	0.998474
Adamts1	Endogenous	0.995811
Tmem173	Endogenous	0.995811
Kif20a	Endogenous	0.995811
Socs3	Endogenous	0.995811
Glg1	Endogenous	0.995811
Serpine3	Endogenous	0.995811
Sirpa	Endogenous	0.995811
Acox1	Endogenous	0.995811
Adamts17	Endogenous	0.995811
Havcr1	Endogenous	0.995811
Gadd45b	Endogenous	0.995811
Cxcr1	Endogenous	0.995811
H2-Q2	Endogenous	0.995811
Cxcl2	Endogenous	0.995811
Col11a1	Endogenous	0.995811
Il3ra	Endogenous	0.83266
Emp1	Endogenous	0.995811
Tgfb1	Endogenous	0.995811
Vwa5a	Endogenous	0.995811
P2rx1	Endogenous	0.995811
Fasn	Endogenous	0.995811
S100a4	Endogenous	0.995811
Tnfrsf14	Endogenous	0.995811
H2-DMa	Endogenous	0.995811
Adamts4	Endogenous	0.995811
Mapk14	Endogenous	0.995811
Cxcl10	Endogenous	0.995811
Pf4	Endogenous	0.995811
Sgpp1	Endogenous	0.995811
Lat2	Endogenous	0.995811
Fbxl7	Endogenous	0.995811
Klrk1	Endogenous	0.995811
Gch1	Endogenous	0.995811
Ctnnb1	Endogenous	0.995811
Amica1	Endogenous	0.995811
Prg2	Endogenous	0.995811
Ros1	Endogenous	0.995811
Cd247	Endogenous	0.995811
Mpo	Endogenous	0.995811
Gzma	Endogenous	0.995811
Tep1	Endogenous	0.995811
Hnf1b	Endogenous	0.995811
Mmp10	Endogenous	0.995811
Prg3	Endogenous	0.995811
Fbp1	Endogenous	0.995811
Runx2	Endogenous	0.995811
Cybb	Endogenous	0.995811
Nlrp3	Endogenous	0.995811
Cytip	Endogenous	0.995811
Ctsg	Endogenous	0.995811
Nmb	Endogenous	0.995811
Cd36	Endogenous	0.995811
Cxcl13	Endogenous	0.995811
Tapbp	Endogenous	0.995811
Ier3	Endogenous	0.995811
Ifng	Endogenous	0.995811
Stat6	Endogenous	0.995811
Tap1	Endogenous	0.995811
Myh4	Endogenous	0.995811
Man2b1	Endogenous	0.995811
Trem2	Endogenous	0.995811
Hist2h2aa1	Endogenous	0.995811
Il2	Endogenous	0.995811
Pfdn6	Endogenous	0.995811
Cdh4	Endogenous	0.995811
Csf1r	Endogenous	0.995811
Gnai3	Endogenous	0.995811
Lat	Endogenous	0.995811
Jun	Endogenous	0.995811
Il1b	Endogenous	0.995811
Tgm2	Endogenous	0.995811
Cd163	Endogenous	0.83266
Cxcr4	Endogenous	0.995811
Vtcn1	Endogenous	0.995811
S100a11	Endogenous	0.995811
Ccr9	Endogenous	0.995811
Il15	Endogenous	0.995811
Ptger2	Endogenous	0.995811
C5ar1	Endogenous	0.995811
Yes1	Endogenous	0.995811
Hdac6	Endogenous	0.995811
Alox5	Endogenous	0.995811
Oscar	Endogenous	0.995811
Cd180	Endogenous	0.995811
Ifit1bl2	Endogenous	0.995811
Rhog	Endogenous	0.995811
Arf6	Endogenous	0.995811
Itgax	Endogenous	0.995811
Ell2	Endogenous	0.995811
Dusp6	Endogenous	0.995811
Vegfc	Endogenous	0.995811
Tlr1	Endogenous	0.995811
Daxx	Endogenous	0.995811
Cxcl3	Endogenous	0.995811
Il18r1	Endogenous	0.995811
Retnlb	Endogenous	0.995811
Selplg	Endogenous	0.996296
Igf1	Endogenous	0.995811
Cd69	Endogenous	0.995811
Cd1d1	Endogenous	0.995811
H2-Ob	Endogenous	0.996296
Loxl2	Endogenous	0.995811
Lrp5	Endogenous	0.995811
Id1	Endogenous	0.995811
Il33	Endogenous	0.995811
Il10ra	Endogenous	0.995811
2810417H13Rik	Endogenous	0.995811
Ccr1	Endogenous	0.995811
Mx1	Endogenous	0.995811
Acly	Endogenous	0.995811
H2-Ea-ps	Endogenous	0.995811
Clec1b	Endogenous	0.995811
Saa1	Endogenous	0.995811
Dpp4	Endogenous	0.996952
Ripk2	Endogenous	0.995811
H2-Aa	Endogenous	0.995811
Tnfrsf9	Endogenous	0.995811
Lif	Endogenous	0.995811
Gk5	Endogenous	0.995811
Fyn	Endogenous	0.995811
Syk	Endogenous	0.995811
Il23a	Endogenous	0.83266
Col12a1	Endogenous	0.995811
Gpr183	Endogenous	0.995811
Tm7sf3	Endogenous	0.995811
B4galt4	Endogenous	0.995811
H2-DMb1	Endogenous	0.995811
Ephb6	Endogenous	0.995811
Marcksl1	Endogenous	0.995811
Flt3	Endogenous	0.995811
Fas	Endogenous	0.995811
Csf1	Endogenous	0.995811
Il25	Endogenous	0.995811
Birc2	Endogenous	0.996296
Tnfrsf12a	Endogenous	0.995811
Prkci	Endogenous	0.995811
Irf7	Endogenous	0.995811
Arhgef6	Endogenous	0.995811
Nfatc1	Endogenous	0.995811
Vamp2	Endogenous	0.995811
H2-Q1	Endogenous	0.995811
Cd1d2	Endogenous	0.995811
Nos2	Endogenous	0.995811
Stat5b	Endogenous	0.995811
Birc5	Endogenous	0.995811
Adam8	Endogenous	0.995811
Osm	Endogenous	0.995811
Alcam	Endogenous	0.995811
Serpinb6a	Endogenous	0.995811
Apoe	Endogenous	0.860608
Ccl6	Endogenous	0.995811
Fscn1	Endogenous	0.995811
S100a8	Endogenous	0.995811
Maff	Endogenous	0.995811
Gata1	Endogenous	0.995811
Krba1	Endogenous	0.995811
Fgf18	Endogenous	0.995811
Plau	Endogenous	0.995811
Adgre1	Endogenous	0.995811
Ccl17	Endogenous	0.995811
Cdc20	Endogenous	0.995811
Casp1	Endogenous	0.995811
Cxcl14	Endogenous	0.995811
Adamts2	Endogenous	0.83266
Cd74	Endogenous	0.9456
Jag1	Endogenous	0.995811
C3	Endogenous	0.995811
Ttk	Endogenous	0.995811
Traf2	Endogenous	0.995811
Socs1	Endogenous	0.995811
Calr	Endogenous	0.995811
Ctsd	Endogenous	0.995811
Tnfaip8	Endogenous	0.995811
H2-T23	Endogenous	0.995811
Prdx3	Endogenous	0.995811
Rab3d	Endogenous	0.995811
Siglec1	Endogenous	0.995811
Aoah	Endogenous	0.995811
Hoxd4	Endogenous	0.995811
Irf3	Endogenous	0.995811
Sele	Endogenous	0.995811
Ccr4	Endogenous	0.995811
Cdh5	Endogenous	0.996296
Map2k3	Endogenous	0.995811
Ctsa	Endogenous	0.995811
Irf2	Endogenous	0.995811
Gsn	Endogenous	0.83266
Clec9a	Endogenous	0.995811
Hes1	Endogenous	0.995811
Il12a	Endogenous	0.995811
Il5	Endogenous	0.995811
Tspan7	Endogenous	0.995811
Cebpg	Endogenous	0.995811
Cdh1	Endogenous	0.995811
Pbx3	Endogenous	0.995811
Smad1	Endogenous	0.995811
Tspan8	Endogenous	0.995811
Cd70	Endogenous	0.995811
Ptprc	Endogenous	0.995811
Tuba4a	Endogenous	0.995811
Sesn1	Endogenous	0.995811
Lamb3	Endogenous	0.995811
Il1r2	Endogenous	0.995811
Vsir	Endogenous	0.995811
Il1rap	Endogenous	0.995811
Ccr6	Endogenous	0.995811
Fpr-rs3	Endogenous	0.83266
Ccl5	Endogenous	0.995811
Nod1	Endogenous	0.995811
Cdh2	Endogenous	0.995811
Il6ra	Endogenous	0.995811
Irf1	Endogenous	0.995811
Cx3cl1	Endogenous	0.995811
Mx2	Endogenous	0.995811
H2-DMb2	Endogenous	0.995811
Fzd9	Endogenous	0.995811
Cd14	Endogenous	0.995811
Ccl25	Endogenous	0.995811
Zfp148	Endogenous	0.995811
Tlr8	Endogenous	0.995811
Fpr-rs6	Endogenous	0.995811
Pdgfa	Endogenous	0.995811
Cebpa	Endogenous	0.995811
Gpr65	Endogenous	0.995811
Fpr3	Endogenous	0.83266
Csf3	Endogenous	0.995811
Timd4	Endogenous	0.995811
Id2	Endogenous	0.995811
Txndc16	Endogenous	0.995811
Camp	Endogenous	0.995811
Tlr11	Endogenous	0.995811
Pim2	Endogenous	0.995811
Cd28	Endogenous	0.995811
Znrf2	Endogenous	0.995811
Col15a1	Endogenous	0.83266
Adora3	Endogenous	0.995811
Ccl9	Endogenous	0.995811
Cxcl16	Endogenous	0.995811
Cbr1	Endogenous	0.995811
Ptprk	Endogenous	0.995811
Fcgr4	Endogenous	0.995811
Il4i1	Endogenous	0.83266
Myod1	Endogenous	0.995811
Rgs1	Endogenous	0.995811
Mapk13	Endogenous	0.995811
Erg	Endogenous	0.995811
Bid	Endogenous	0.995811
Rasgrf2	Endogenous	0.995811
Ly6g	Endogenous	0.9456
Ccr8	Endogenous	0.995811
H2-D1	Endogenous	0.995811
Ceacam1	Endogenous	0.995811
Bmp6	Endogenous	0.995811
Col4a1	Endogenous	0.995811
Myc	Endogenous	0.995811
Cd27	Endogenous	0.995811
Cxcl12	Endogenous	0.995811
Phlda2	Endogenous	0.995811
Faf1	Endogenous	0.995811
Sqstm1	Endogenous	0.995811
Vrk2	Endogenous	0.995811
Cd34	Endogenous	0.933619
Furin	Endogenous	0.995811
Nfkb1	Endogenous	0.995811
Smad2	Endogenous	0.995811
Cxcl1	Endogenous	0.995811
Casp7	Endogenous	0.995811
Icos	Endogenous	0.995811
Gata3	Endogenous	0.995811
Ccl8	Endogenous	0.370782
Fut4	Endogenous	0.995811
Il27ra	Endogenous	0.995811
Map3k4	Endogenous	0.995811
Fpr-rs5	Endogenous	0.995811
Nampt	Endogenous	0.995811
H2-M3	Endogenous	0.995811
Ceacam2	Endogenous	0.995811
Usp18	Endogenous	0.995811
Tnf	Endogenous	0.995811
Tfcp2	Endogenous	0.995811
Lrp6	Endogenous	0.995811
Serpinb9	Endogenous	0.995811
Msh2	Endogenous	0.995811
Sfrp4	Endogenous	0.83266
Cysltr1	Endogenous	0.995811
Crabp2	Endogenous	0.995811
S1pr1	Endogenous	0.995811
Tnfrsf1a	Endogenous	0.995811
Atf3	Endogenous	0.995811
Top2a	Endogenous	0.995811
Tlr7	Endogenous	0.995811
Cd151	Endogenous	0.995811
Col14a1	Endogenous	0.0740113
Lamb2	Endogenous	0.995811
Col17a1	Endogenous	0.995811
C1qc	Endogenous	0.370782
Rgl1	Endogenous	0.995811
Dnajb6	Endogenous	0.995811
Eif4ebp2	Endogenous	0.995811
Il1a	Endogenous	0.995811
Ltb	Endogenous	0.995811
Icam1	Endogenous	0.995811
Cxcl9	Endogenous	0.995811
Mrc2	Endogenous	0.995811
Mmp1a	Endogenous	0.995811
Angpt1	Endogenous	0.995811
Ptgs2	Endogenous	0.83266
Alox5ap	Endogenous	0.995811
Pdgfrb	Endogenous	0.995811
Cyr61	Endogenous	0.995811
Txn1	Endogenous	0.995811
Adamts12	Endogenous	0.995811
Rasal1	Endogenous	0.995811
Itgal	Endogenous	0.995811
Cxcl11	Endogenous	0.995811
Ccrl2	Endogenous	0.995811
Egf	Endogenous	0.995811
Ptgdr	Endogenous	0.83266
Nrip3	Endogenous	0.995811
Pdcd1lg2	Endogenous	0.995811
Cav1	Endogenous	0.995811
Acad10	Endogenous	0.995811
Cnksr1	Endogenous	0.995811
Tgfbr3	Endogenous	0.995811
Stat1	Endogenous	0.995811
Hist1h1c	Endogenous	0.995811
Chil3	Endogenous	0.995811
Pdgfb	Endogenous	0.995811
Egr3	Endogenous	0.995811
Enpep	Endogenous	0.995811
Slc16a6	Endogenous	0.995811
Il13	Endogenous	0.995811
Pros1	Endogenous	0.995811
Adcyap1r1	Endogenous	0.995811
Ccl11	Endogenous	0.995811
Cldn1	Endogenous	0.995811
Lgals3	Endogenous	0.995811
Rapgef4	Endogenous	0.995811
Col1a2	Endogenous	0.83266
Enpp2	Endogenous	0.992337
Btla	Endogenous	0.995811
Spry2	Endogenous	0.995811
Map3k14	Endogenous	0.995811
Serpinb2	Endogenous	0.995811
Zmpste24	Endogenous	0.995811
Sell	Endogenous	0.995811
Cd47	Endogenous	0.995811
Nr4a1	Endogenous	0.995811
Enc1	Endogenous	0.995811
Mapk11	Endogenous	0.995811
Fosl1	Endogenous	0.995811
Hbegf	Endogenous	0.995811
Fpr2	Endogenous	0.995811
Cdh13	Endogenous	0.370782
Prkca	Endogenous	0.995811
Ptpn14	Endogenous	0.995811
Rhoc	Endogenous	0.995811
Tlr5	Endogenous	0.000185149
Adamts3	Endogenous	0.995811
Cd38	Endogenous	0.995811
Jak3	Endogenous	0.995811
Rnase2a	Endogenous	0.83266
Cd244	Endogenous	0.995811
Ctss	Endogenous	0.995811
Lst1	Endogenous	0.995811
Itgam	Endogenous	0.995811
Grn	Endogenous	0.886875
Il3	Endogenous	0.995811
Malt1	Endogenous	0.995811
Angpt2	Endogenous	0.995811
Ly6c1	Endogenous	0.995811
Elovl6	Endogenous	0.843303
Tnfsf9	Endogenous	0.995811
Hivep1	Endogenous	0.995811
Areg	Endogenous	0.83266
Fpr-rs4	Endogenous	0.995811
Cd99	Endogenous	0.995811
Fosb	Endogenous	0.995811
Cd276	Endogenous	0.995811
Skil	Endogenous	0.995811
Dusp1	Endogenous	0.83266
Tlr2	Endogenous	0.995811
Cttnbp2	Endogenous	0.995811
Tlr6	Endogenous	0.995811
Thbd	Endogenous	0.995811
F11r	Endogenous	0.995811
Btg2	Endogenous	0.995811
Clic4	Endogenous	0.995811
Il18	Endogenous	0.995811
Golim4	Endogenous	0.995811
Bcl2	Endogenous	0.995811
Chil4	Endogenous	0.995811
Kcnq1ot1	Endogenous	0.995811
Rad51	Endogenous	0.995811
Tnc	Endogenous	0.995811
Tlr3	Endogenous	0.995811
Ndc80	Endogenous	0.370782
Ngf	Endogenous	0.995811
Aif1	Endogenous	0.370782
Pparg	Endogenous	0.995811
Egr2	Endogenous	0.995811
Fzd6	Endogenous	0.995811
Gata2	Endogenous	0.995811
Mcm5	Endogenous	0.995811
Tnfsf4	Endogenous	0.995811
Cxcr5	Endogenous	0.995811
Mmp9	Endogenous	0.995811
Ccl2	Endogenous	0.995811
Acot3	Endogenous	0.995811
Nr1h3	Endogenous	0.995811
Il21r	Endogenous	0.995811
Ms4a1	Endogenous	0.995811
Rnd3	Endogenous	0.995811
Traf1	Endogenous	0.995811
Prdx1	Endogenous	0.995811
Ifnb1	Endogenous	0.995811
Rnase2b	Endogenous	0.995811
Cstb	Endogenous	0.995811
Dhrs3	Endogenous	0.995811
Nod2	Endogenous	0.995811
Yap1	Endogenous	0.995811
Ncor1	Endogenous	0.995811
H2-K1	Endogenous	0.995811
Irf5	Endogenous	0.995811
Bcl6	Endogenous	0.995811
Met	Endogenous	0.995811
Hpgds	Endogenous	0.995811
Nr2f6	Endogenous	0.995811
Nfkbiz	Endogenous	0.995811
Selp	Endogenous	0.995811
Tek	Endogenous	0.995811
Mafb	Endogenous	0.995811
C1qa	Endogenous	0.370782
Vegfa	Endogenous	0.995811
Anxa4	Endogenous	0.995811
Mmp13	Endogenous	0.995811
Lamp3	Endogenous	0.995811
Stab1	Endogenous	0.995811
Rbp1	Endogenous	0.995811
Hdac5	Endogenous	0.995811
Cxcr6	Endogenous	0.995811
Kalrn	Endogenous	0.995811
Arg1	Endogenous	0.995811
Il9	Endogenous	0.995811
Laptm5	Endogenous	0.995811
Smad7	Endogenous	0.995811
Ptgdr2	Endogenous	0.995811
Il15ra	Endogenous	0.995811
Tgfa	Endogenous	0.995811
Tnfrsf4	Endogenous	0.995811
Cnn2	Endogenous	0.995811
Ptgds	Endogenous	0.83266
Csf2	Endogenous	0.995811
Ifnar2	Endogenous	0.83266
Flnb	Endogenous	0.995811
Ercc1	Endogenous	0.995811
Ccl27a	Endogenous	0.995811
Mmp19	Endogenous	0.995811
Sema4b	Endogenous	0.995811
Vav1	Endogenous	0.995811
Ncf2	Endogenous	0.995811
Tnfrsf11a	Endogenous	0.995811
Lta4h	Endogenous	0.995811
Itgb7	Endogenous	0.995811
Hgf	Endogenous	0.995811
Cebpd	Endogenous	0.995811
Itgb2	Endogenous	0.995811
Pik3cg	Endogenous	0.995811
Cyp3a13	Endogenous	0.995811
Batf3	Endogenous	0.995811
S100a9	Endogenous	0.995811
Psmb8	Endogenous	0.995811
Acod1	Endogenous	0.995811
Ifna1	Endogenous	0.995811
Marco	Endogenous	0.995811
Rin2	Endogenous	0.995811
Ccr2	Endogenous	0.995811
Coasy	Endogenous	0.995811
Tuba1a	Endogenous	0.995811
Tnfrsf8	Endogenous	0.995811
Acot11	Endogenous	0.995811
Sptbn1	Endogenous	0.995811
Itga4	Endogenous	0.995811
Nectin1	Endogenous	0.83266
Ccnb2	Endogenous	0.995811
Serpinb7	Endogenous	0.995811
Ptx3	Endogenous	0.995811
En1	Endogenous	0.995811
Pdcd1	Endogenous	0.995811
Il6	Endogenous	0.995811
Mif	Endogenous	0.995811
Cdh11	Endogenous	0.995811
Csf2ra	Endogenous	0.995811
Armc1	Endogenous	0.995811
Irf8	Endogenous	0.995811
Itgb1	Endogenous	0.995811
Daglb	Endogenous	0.996296
Edn1	Endogenous	0.995811
Adgre5	Endogenous	0.995811
Lag3	Endogenous	0.995811
H2-Ab1	Endogenous	0.995811
Fgfr1	Endogenous	0.995811
Csf3r	Endogenous	0.995811
Adora2a	Endogenous	0.995811
Adam19	Endogenous	0.995811
Pde4a	Endogenous	0.995811
Cd40lg	Endogenous	0.995811
Rab20	Endogenous	0.995811
Ptgs1	Endogenous	0.995811
Map2k4	Endogenous	0.995811
Hspg2	Endogenous	0.995811
Rgs6	Endogenous	0.995811
Plaur	Endogenous	0.995811
Il17ra	Endogenous	0.995811
Il10	Endogenous	0.995811
C4a	Endogenous	0.995811
Sp4	Endogenous	0.995811
Fgf10	Endogenous	0.995811
Rgs16	Endogenous	0.886875
Adamts9	Endogenous	0.995811
Arhgef28	Endogenous	0.995811
Xcr1	Endogenous	0.995811
Sema4a	Endogenous	0.995811
Traf6	Endogenous	0.995811
Tnfrsf1b	Endogenous	0.995811
Cd44	Endogenous	0.995811
Bcl10	Endogenous	0.995811
Mertk	Endogenous	0.996296
Cxcr2	Endogenous	0.83266
Ifnar1	Endogenous	0.995811
Il5ra	Endogenous	0.995811
Isg15	Endogenous	0.995811
Serinc2	Endogenous	0.995811
Nox4	Endogenous	0.995811
Il22	Endogenous	0.995811
Pglyrp1	Endogenous	0.995811
Ido1	Endogenous	0.995811
Il1rn	Endogenous	0.995811
Rhoj	Endogenous	0.995811
Tlr4	Endogenous	0.995811
Kit	Endogenous	0.995811
Fcgr2b	Endogenous	0.995811
Tnfaip6	Endogenous	0.995811
Trem1	Endogenous	0.995811
Psmb9	Endogenous	0.995811
Cd209e	Endogenous	0.995811
Fadd	Endogenous	0.995811
Icosl	Endogenous	0.995811
Cyp1b1	Endogenous	0.995811
Fzd4	Endogenous	0.995811
Id3	Endogenous	0.995811
Ptafr	Endogenous	0.995811
Fabp4	Endogenous	0.995811
Ccr5	Endogenous	0.995811
Mapk12	Endogenous	0.995811
Hpgd	Endogenous	0.995811
2900026A02Rik	Endogenous	0.995811
Ifngr1	Endogenous	0.995811
Ltb4r1	Endogenous	0.995811
Insr	Endogenous	0.995811
Cxcr3	Endogenous	0.995811
Terf2ip	Endogenous	0.995811
Prok2	Endogenous	0.995811
Mrc1	Endogenous	0.995811
Klf4	Endogenous	0.995811
Nox3	Endogenous	0.995811
Nectin2	Endogenous	0.995811
Hmgb1	Endogenous	0.996296
Cd84	Endogenous	0.995811
Stat3	Endogenous	0.995811
Col3a1	Endogenous	0.513957
Tyrobp	Endogenous	0.996952
Map2k2	Endogenous	0.995811
Tlr13	Endogenous	0.995811
Sphk1	Endogenous	0.995811
Timp3	Endogenous	0.995811
Fgf7	Endogenous	0.995811
Cxcl5	Endogenous	0.995811
Akap13	Endogenous	0.995811
Ccl7	Endogenous	0.995811
Ms4a2	Endogenous	0.83266
Lipa	Endogenous	0.995811
Birc3	Endogenous	0.995811
Itga5	Endogenous	0.995811
Havcr2	Endogenous	0.995811
Pbx1	Endogenous	0.995811
Ccl1	Endogenous	0.83266
Clec7a	Endogenous	0.995811
Il27	Endogenous	0.995811
Trafd1	Endogenous	0.995811
Kitl	Endogenous	0.995811
Gata6	Endogenous	0.995811
Cpa3	Endogenous	0.995811
Ltb4r2	Endogenous	0.995811
Fcer2a	Endogenous	0.995811
Mmp8	Endogenous	0.995811
S100a10	Endogenous	0.995811
Ldlr	Endogenous	0.995811
Tpsb2	Endogenous	0.83266
Mmp12	Endogenous	0.995811
Map2k1	Endogenous	0.995811
Tlr12	Endogenous	0.995811
Vcam1	Endogenous	0.995811
Myd88	Endogenous	0.995811
Nfkbie	Endogenous	0.995811
C1qb	Endogenous	0.370782
Elane	Endogenous	0.995811
Tnfsf10	Endogenous	0.995811
Sema5a	Endogenous	0.995811
Fpr1	Endogenous	0.995811
Ddr2	Endogenous	0.995811
Fn1	Endogenous	0.995811
Pycard	Endogenous	0.995811
Vasp	Endogenous	0.995811
Alox15	Endogenous	0.995811
Ifit1bl1	Endogenous	0.995811
Lta	Endogenous	0.83266
Tap2	Endogenous	0.995811
Nfyc	Endogenous	0.995811
Smarcd3	Endogenous	0.995811
Col10a1	Endogenous	0.995811
Trex1	Endogenous	0.995811
Peli1	Endogenous	0.995811
Gem	Endogenous	0.995811
Cd83	Endogenous	0.995811
Nkg7	Endogenous	0.995811
Ear6	Endogenous	0.995811
Cebpb	Endogenous	0.995811
Ikbke	Endogenous	0.995811
Kcnab1	Endogenous	0.83266
Col4a2	Endogenous	0.995811
Zfp92	Endogenous	0.995811
Ido2	Endogenous	0.995811
Ctgf	Endogenous	0.995811
Fcgr3	Endogenous	0.83266
Cdkn1a	Endogenous	0.995811
Abcc8	Endogenous	0.995811
Msc	Endogenous	0.995811
Pdgfra	Endogenous	0.995811
Il1r1	Endogenous	0.995811
Stat4	Endogenous	0.995811
Socs2	Endogenous	0.995811
Scin	Endogenous	0.995811
Nfkbia	Endogenous	0.995811
Adamts14	Endogenous	0.995811
Siglecf	Endogenous	0.995811
Ctsl	Endogenous	0.995811
Insig1	Endogenous	0.995811
Ccl19	Endogenous	0.995811
Batf	Endogenous	0.995811
Prrx1	Endogenous	0.995811
Gtf2h2	Endogenous	0.995811
Dusp2	Endogenous	0.995811
Retnla	Endogenous	0.995811
Pggt1b	Endogenous	0.995811
Tigit	Endogenous	0.370782
Mpeg1	Endogenous	0.995811
Ccl12	Endogenous	0.995811
Rictor	Endogenous	0.995811
Was	Endogenous	0.995811
Sema6d	Endogenous	0.995811
Anxa1	Endogenous	0.995811
Nubp1	Housekeeping	0.995811
Abcf1	Housekeeping	0.995811
Ppia	Housekeeping	0.995811
Sdha	Housekeeping	0.963965
Rpl19	Housekeeping	0.995811
Polr2a	Housekeeping	0.995811
Oaz1	Housekeeping	0.995811
Sf3a3	Housekeeping	0.995811
Hdac3	Housekeeping	0.995811
Alas1	Housekeeping	0.995811
Tbp	Housekeeping	0.995811
G6pdx	Housekeeping	0.995811
Eef1g	Housekeeping	0.995811
Tubb5	Housekeeping	0.995811
Eif2b4	Housekeeping	0.995811
Polr1b	Housekeeping	0.995811
Edc3	Housekeeping	0.995811
Hprt	Housekeeping	0.995811
Sap130	Housekeeping	0.995811
Gusb	Housekeeping	0.995811
